# Supplementary material for: Possible Roles of Interleukin-4 and -13 and Their Receptors in Gastric and Colon Cancer
Source: Int J Mol Sci. 2021 Jan 13;22(2):727. doi: 10.3390/ijms22020727 (PMC7828336; doi:10.3390/ijms22020727)
Supplement: Supplementary file 1 [file ijms-22-00727-s001.pdf]

**Supplemental Table 1.** Effects of IL-4/IL-13 in GC

| Research object                                                       | Methods                                                                    | Main results                                                                                                                               | Reference |
|-----------------------------------------------------------------------|----------------------------------------------------------------------------|--------------------------------------------------------------------------------------------------------------------------------------------|-----------|
| CRL1739 cells, human GC specimens                                     | Immunoprecipitation and immunoblot analysis                                | IL-4R $\alpha$ and IL-2R $\gamma$ -common chain were expressed in CRL1739 cells and GC specimens.                                          | 42        |
| CRL1739 cells                                                         | Protein synthesis assay using [ <sup>3</sup> H]leucine                     | One chimeric protein composed of IL-13 and Pseudomonas exotoxin was highly cytotoxic.                                                      | 39        |
| HTB-135 cells                                                         | Cell Cycle Analysis Kit (Becton Dickinson), FCM                            | IL-4 inhibited proliferation of GC cells by blocking cell cycle progression.                                                               | 43        |
| MKN-45 and AGS cells                                                  | Boyden chamber assays                                                      | CHI3L1 secreted by M2 macrophage could promote the metastasis of GC cell lines by binding to the IL-13R $\alpha$ 2 chain.                  | 40        |
| AGS and MGC308 cells; 100 human GC tissues                            | Co-immunoprecipitation assay, immunofluorescence, IHC                      | CD44v3 bound to both CHI3L1 and IL-13R $\alpha$ 2 in GC cell lines. CHI3L1 was upregulated during GC development.                          | 32        |
| HTB13, CRL1863, CRL1739, and KATO III cells; one primary GC cell line | Standard [ <sup>3</sup> H]thymidine incorporation proliferation assay, FCM | IL-4 could inhibit the growth of GC cells and this effect was positively related with IL-4R expression level of the respective cell lines. | 44        |
| 507 GC patients                                                       | Tissue microarray and IHC                                                  | Overexpression of IL-13R $\alpha$ 2 chain in GC tissues was associated with poor prognosis after gastrectomy.                              | 15        |
| 30 biopsies from GC patients                                          | IHC                                                                        | The expression of IL-4 was higher in stages I and II GC than in stages III and IV.                                                         | 46        |
| 17 patients and 30 healthy controls                                   | sandwich ELISA kit (Affymetrix eBioscience)                                | Serum IL-4 levels in patients were significantly higher than in controls.                                                                  | 45        |
| 25 patients and 54 healthy controls                                   | Bio-Plex human cytokine assay (Bio-Rad)                                    | Cytokine levels of IL-4 and IL-13 in patients' plasma were significantly higher than in controls.                                          | 41        |

Cell lines mentioned in this table are all human GC cell lines unless otherwise indicated. GC: gastric cancer; IHC: immunohistochemistry; CHI3L1: Chitinase 3-like protein 1; ELISA: enzyme-linked immunosorbent assay.

**Supplemental Table 2.** Effects of IL-4/IL-13 in CRC cells

| Research object                                             | Methods                                                                                                        | Results                                                                                                                                                                                                                                                            | Reference |
|-------------------------------------------------------------|----------------------------------------------------------------------------------------------------------------|--------------------------------------------------------------------------------------------------------------------------------------------------------------------------------------------------------------------------------------------------------------------|-----------|
| LS174T and HT-29 cells                                      | WB, RT-PCR                                                                                                     | IL-4 and IL-13 increased mucin 2 expression in LS174T cells, but not in HT-29 cells.                                                                                                                                                                               | 48        |
| HT-29 cells                                                 | WB, RT-PCR, Northern blot; L-[ <sup>14</sup> C]valine                                                          | IL-13 could inhibit the macroautophagy pathway via the activation of the class I PI3K.                                                                                                                                                                             | 49        |
| HT-29 cells                                                 | WB; [ <sup>14</sup> C]valine                                                                                   | Overexpression of tumor suppressor phosphatase and tensin homolog could counteract the IL-13 down-regulation of macroautophagy.                                                                                                                                    | 50        |
| Colo201 and Colo205 cells                                   | Protein synthesis assay using [ <sup>3</sup> H]leucine                                                         | One chimeric protein composed of IL-13 and Pseudomonas exotoxin was highly cytotoxic.                                                                                                                                                                              | 39        |
| HT-29 and WiDr cells                                        | WB                                                                                                             | IL-13 induced phosphorylation of JAK2, JAK1, and Tyk2. IL-13 and IL-4 could induce phosphorylation of STAT6.                                                                                                                                                       | 51        |
| HT-29, CaCo-2, DLD-1, T84 cells                             | FCM, Northern blot, IP                                                                                         | IL-4 and IL-13 could upregulate expression of CD44.                                                                                                                                                                                                                | 52        |
| RKO and SW480 cells                                         | MTT, transwell assay, RT-PCR, WB, luciferase assay                                                             | Propofol suppressed cell proliferation and IL-13 induced EMT in CRC cell lines. Propofol suppressed IL-13/STAT6 signaling pathway.                                                                                                                                 | 54        |
| HT29, SW480, Caco2 cells                                    | WB, PCR, transwell assays, ChIP, luciferase reporter assay                                                     | IL-13 promoted EMT and aggressiveness of CRC through IL-13R $\alpha$ 1/STAT6/ZEB1 pathway.                                                                                                                                                                         | 55        |
| HT-29, WiDr, SW1116, Co-115, LS411N, LS513 and LS1034 cells | MTT assay and incorporation of [ <sup>3</sup> H]-TdR; FACS; northern blot; biotin-labeled IL-4 binding studies | In HT29, WiDr, LS411N, LS513, LS1034 cells, IL-4 inhibited proliferation; in CO-115 and SW1116 cells, no difference. Three cell lines (HT29, LS1034, WiDr) exhibited relatively high density of the IL-4R and 4 (Co-115, LS411N, LS513, SW1116) had lower density. | 65        |
| HT-29 and DLD-1 cells                                       | Cell proliferation was determined by counting the cells.                                                       | IL-4 and IL-13 increased nicotinamide adenine dinucleotide phosphate oxidase 1-related proliferation.                                                                                                                                                              | 12        |
| HT-29 and WiDr cells                                        | [ <sup>3</sup> H]-TdR incorporation assay                                                                      | IL-4 inhibited cell growth of CRC cells.                                                                                                                                                                                                                           | 69        |
| HT-29 cells                                                 | Cell counting or colorimetric MTT assay.                                                                       | IL-4 inhibited the growth of HT-29 cells.                                                                                                                                                                                                                          | 70        |
| HTB 38 cells                                                | Human tumor cloning assay                                                                                      | IL-4 showed antiproliferative activity.                                                                                                                                                                                                                            | 71        |
| LS531 cells                                                 | [ <sup>3</sup> H]-TdR incorporation assay                                                                      | IL-4 inhibited cell proliferation.                                                                                                                                                                                                                                 | 73        |
| HT-29 cells                                                 | FACS. PBMCs were separated from a patient with chronic lymphocytic leukemia.                                   | IL-4 significantly suppressed IL-12, IL-2 and IFN- $\alpha$ enhanced ADCC against HT-29 cells.                                                                                                                                                                     | 75        |

|                                                                      |                                                                               |                                                                                                                                                                              |    |
|----------------------------------------------------------------------|-------------------------------------------------------------------------------|------------------------------------------------------------------------------------------------------------------------------------------------------------------------------|----|
| SW948 cells,<br>human PBMCs,<br>mAb 17-1A                            | PBMCs were incubated<br>for 0-24 h with IL-4<br>before ADCC assay             | Pretreatment with 1 ng/ml IL-4 for 2 hours induced<br>a significant increase in the ADCC activity of<br>PBMCs.                                                               | 76 |
| LS174T cells;<br>human<br>peripheral<br>monocytes                    | 24-h <sup>111</sup> In-release assay<br>was used to measure<br>ADCC activity. | IL-4 and macrophage colony-stimulating factor had<br>a synergistic enhancement effect of monocyte-<br>mediated ADCC on LS174T cells.                                         | 78 |
| HT-29 cells,<br>PBMCs                                                | Flow cytometric<br>cytotoxicity assay                                         | IL-4 decreased ADCC and reduced the IL-2, IL-12,<br>and IFN-alpha-induced ADCC.                                                                                              | 79 |
| SW620 cells                                                          | ELISA                                                                         | IL-4 sensitized SW620 cells to radiation by inhibiting<br>NF-kappaB.                                                                                                         | 80 |
| HT-29, LoVo<br>and SW480 cells                                       | Indirect<br>immunofluorescence,<br>FACS                                       | IL-4 could decrease epithelial cellular adhesion<br>molecule and Lewis <sup>y</sup> expression in HT-29 and LoVo<br>cells, but not in SW480 cells.                           | 81 |
| LS174T cells                                                         | Northern blot, RT-<br>PCR, FCM                                                | IL-4 inhibited the expression of stem cell factor and<br>its receptor c-kit in LS174T cells. IL-4 could also<br>inhibit stem cell factor-induced proliferation.              | 82 |
| HRT18, H29/6<br>and HT115 cells                                      | ELISA                                                                         | The addition of IL-4 increased IL-8 release in HT115<br>cells, but not in HRT18 and H29/6 cells.                                                                             | 83 |
| Colo205 cells                                                        | FCM, RT-PCR analysis                                                          | IL-4 inhibited cell-cell adhesion but not cell<br>proliferation. IL-4 and IL-13 could down-regulate E-<br>cadherin and carcinoembryonic antigen molecules.                   | 84 |
| Primary CRC<br>cell lines CoSp,<br>Cope, and<br>CoDo; HT-29<br>cells | WB, RT-PCR, transwell<br>assay                                                | IL-4 was an inhibitor of hepatocyte growth factor<br>and it could regulate hepatocyte growth factor-<br>induced cell proliferation and other events of tumor<br>progression. | 85 |
| WiDr and HT-<br>29 cells                                             | [ <sup>3</sup> H]-TdR uptake<br>studies, IP and WB,<br>northern analysis      | The addition of IL-4 phosphorylated JAK1, JAK2,<br>and Tyk2, and activated JAK1 and JAK2.                                                                                    | 86 |
| Caco cells                                                           | RT-PCR, MTT assay,<br>trypan blue test, ELISA                                 | Anti-IL-4 antibody inhibited the growth of the Caco<br>cells. Neutralizing of IL-4 increased the efficacy of<br>chemotherapy and inhibited the CD133+ cells.                 | 88 |
| HT-29 and<br>Caco-2 cells                                            | RT-PCR, FCM,<br>transwell migration<br>assay                                  | IL-4/Stat6 activities correlated with apoptosis and<br>metastasis in colon cancer cells.                                                                                     | 89 |

Cell lines mentioned in this table are all human colon cancer cell lines unless otherwise indicated. CRC: colon and rectal cancer; WB: Western blot; RT-PCR: reverse transcription-polymerase chain reaction; PI3K: phosphatidylinositol 3-kinase; JAK: Janus kinase; STAT: signal transducer and activator of transcription; FCM: flow cytometry; MTT: 3-(4,5-Dimethylthiazol-2-yl)-2,5-diphenyltetrazoliumbromide; ChIP: chromatin immunoprecipitation; IP: immunoprecipitation; EMT: epithelial-mesenchymal transition; ZEB1: Zinc finger E-Box binding homeobox 1; FACS: fluorescence-activated cell sorting; IFN: interferon; ADCC: antibody-dependent cellular cytotoxicity; PBMC: peripheral blood mononuclear cell; PKH: Paul Karl Horan; ELISA: enzyme-linked immunosorbent assay; NF-κB: nuclear factor kappa-light-chain-enhancer of activated B-cells; EpCAM: epithelial cellular adhesion molecule.

**Supplemental Table 3.** Effects of IL-4/IL-13 in CRC mouse models or patients

| Research object                                                             | Methods                                                                          | Results                                                                                                                                                                                                                              | Reference |
|-----------------------------------------------------------------------------|----------------------------------------------------------------------------------|--------------------------------------------------------------------------------------------------------------------------------------------------------------------------------------------------------------------------------------|-----------|
| KM12, KM12C and KM12SM cells, nude mice and 80 CRC patient tissues          | ELISA, WB, IHC, FCM                                                              | High expression of IL-13R $\alpha$ 2 in KM12 cells was associated with liver metastasis in nude mice. IL-13R $\alpha$ 2 overexpression in CRC tissues was associated with later stages and poor prognosis.                           | 13        |
| Tissues from 359 patients                                                   | IHC                                                                              | High expression of IL-4, IL-4R, and IL-13R was associated with a lower frequency of lymph node metastases.                                                                                                                           | 47        |
| KM12SM, SW620, a metastasis model of nude mice                              | WB, IHC, IP, transwell assay                                                     | IL-13R $\alpha$ 2 induced activation of the FAK and PI3K/AKT/mTOR pathways and this was mediated by FAM120A.                                                                                                                         | 11        |
| SW480 cells and murine CC cells                                             | WB, quantitative RT-PCR, MTT assay, colony formation assay; nude mice            | IL-13 induced the expression of 11 $\beta$ HSD2 in CRC cells through IL-13R $\alpha$ 2 and promoted the malignancy of CRC.                                                                                                           | 56        |
| CT26, murine liver metastasis model                                         | Mass spectrometry analysis, WB, IP, MTT assays, FCM                              | Protein tyrosine phosphatase-1B could mediate IL-13-induced cancer cell proliferation, migration, invasion and survival.                                                                                                             | 57        |
| KM12SM, SW620, RKO cells, mouse models                                      | ELISA, real-time PCR, WB, IHC                                                    | IL-4 and IL-13 both up-regulated the expression of chemokine eotaxin-2 in LS174T and LOVO cells.                                                                                                                                     | 58        |
| LS174T, LOVO, SW480 and COLO 205 cells; 25 CRC patients                     |                                                                                  |                                                                                                                                                                                                                                      |           |
| Mouse model of CRC induced by injection of azoxymethane; HT29 cells         | WB, IHC, MTT assay, Bio-Plex Pro Mouse Cytokine 23-Plex Panel                    | The formation of CRC was more frequent in obese mice than wild type mice. Silencing IL-13R $\alpha$ 1 inhibited IL-13-induced proliferation in HT29.                                                                                 | 59        |
| Murine CRC lung metastasis model; murine CC cell line CT26                  | FCM, BALB/c mice and CD1-knockout mice                                           | The development of lung metastases could be significantly decreased by an IL-13 inhibitor, but not by inhibiting IL-4.                                                                                                               | 60        |
| KM12SM and SW620 cells, nude mice and Balb/c mice                           | Competition ELISA, MTT assay, wound healing assay, transwell invasion assay, FCM | IL-13R $\alpha$ 2 D1 peptide inhibited migration, invasion, and proliferation in metastatic CRC cells treated with IL-13. Nude mice treated with the enantiomer D-D1 peptide showed a significantly survival increase to metastasis. | 61        |
| IL-4R $\alpha$ and IL-13 transgenic mouse models, CRC patients and controls | IHC, case-control epidemiology study, FCM, multiplex immunoassay                 | Reduced IL-4R signalling increased CRC risk but reduced tumor progression. It had no effect on CRC mortality.                                                                                                                        | 62        |
| 241 patients with CRC                                                       | ELISA                                                                            | Patients with advanced stage of CRC had lower serum IL-13 levels. Low serum IL-13 was associated with poorer prognosis.                                                                                                              | 63        |

|                                                                                   |                                                                                  |                                                                                                                                                                         |    |
|-----------------------------------------------------------------------------------|----------------------------------------------------------------------------------|-------------------------------------------------------------------------------------------------------------------------------------------------------------------------|----|
| Fecal protein from 20 CRC patients and 20 healthy controls                        | ELISA, bicinchoninic acid assay                                                  | The expression of IL-13 was significantly higher in CRC patients.                                                                                                       | 64 |
| Murine CC cell line CT26 tumor-bearing mice                                       | ELISA, quantitative RT-PCR                                                       | Protein levels of IL-4, and IL-13 were higher in the serum or the tumor homogenates of CT26 tumor-bearing mice.                                                         | 66 |
| Patients with metaplastic polyps, adenomas, or carcinomas                         | IL-4R was detected by IHC                                                        | The expression of IL-4R was positive in all polyps (5/5), adenomas (15/15) and in 40/45 carcinomas.                                                                     | 67 |
| HCT116, HT-29, DLD-1, SW480, SW620, Caco2 and HCA7 cells; IL-4R $\alpha$ -/- mice | MTT assay, RT-PCR, WB, FCM, immunostaining                                       | IL-4R $\alpha$ expression promoted tumor growth in HCT116, HT-29, DLD-1, SW480, SW620, Caco2 and HCA7 cells, but IL-4 could only decrease apoptosis in HCT116 cells.    | 68 |
| HCT116 and RKO cells; subcutaneous xenograft mouse models, 218 human CRC samples  | WB, qRT-PCR, luciferase assay, chromatin IP assay, transwell invasion assay, IHC | IL-4 could promote EMT of HCT116 and RKO cells through E2F1/SP3/STAT6 axis. Analysis of clinical CRC samples showed a positive correlation between E2F1, SP3 and STAT6. | 74 |
| HT-29 cells and a metastasis model in nude mice                                   | FCM, northern blot                                                               | IL-4 changed the expression of integrin and decreased the lung-colonizing ability of HT-29 cells.                                                                       | 87 |
| Primary human CC cells; nude mice                                                 | FCM, IHC, immunofluorescence analysis, WB                                        | CC growth was dictated by stem-like cells which were resistant to chemotherapy due to autocrine of IL-4.                                                                | 14 |
| CC-bearing mice                                                                   | qRT-PCR, ELISA, immunofluorescence                                               | Addition of IL-4 improved muscle function and lifespan of CC-bearing mice.                                                                                              | 90 |
| HCT116 cells; NOD/SCID mice; CC tissues from 40 patients                          | RT-PCR, IHC, WB, FCM, transwell migration assay                                  | Over-expression of IL-12 could inhibit the expression of IL-4 and STAT6 in CSCs and inhibit their survival.                                                             | 91 |
| MC38 murine CC cell line, mice                                                    | IHC, 4-h 51Cr-release assays, female C57BL/6 (B6) mice                           | IL-4 combined with CpG oligonucleotide could suppress tumor growth by activating Th1-type immune responses.                                                             | 92 |
| Murine CC cell line CT26 tumor-bearing mice                                       | IHC, FCM, qRT-PCR                                                                | An IL-4R $\alpha$ aptamer-liposome-CpG oligodeoxynucleotide delivery system had enhanced anti-tumor activity.                                                           | 93 |
| Murine CC cell line colon 26; BALB/c mice                                         | IL-4 overexpressing colon 26 cells; ELISA; 51Cr release assays                   | Overexpression of IL-4 in colon 26 cells could induce local tumor killing as well as systemic immunity in mice.                                                         | 94 |
| MC38 murine CC cell line, female B6 mice                                          | Subcutaneous tumor models of mice; 4-h 51Cr-release assays                       | IL-4 overexpression MC38 cells promoted a tumor-specific Th1-type response in B6 mice.                                                                                  | 95 |

|                                                              |                                                                      |                                                                                                                                                          |     |
|--------------------------------------------------------------|----------------------------------------------------------------------|----------------------------------------------------------------------------------------------------------------------------------------------------------|-----|
| 66 patients with CRC and 87 healthy controls                 | multiplex bead array immunoassay (Millipore)                         | Serum levels of IL-4 were higher in CRC patients.                                                                                                        | 96  |
| 77 CRC patients, 70 healthy controls                         | ELISA                                                                | Serum IL-4 levels of the patients were significantly higher than the control group.                                                                      | 97  |
| 105 CRC patients                                             | ELISA                                                                | The serum levels of IL-4 can be used as a marker of pre-invasive to invasive CRC.                                                                        | 98  |
| 10 CRC patients with liver metastases and 5 healthy controls | Flow cytometric immunophenotyping                                    | Higher serum levels of IL-4 were found in patients than controls. The CD8+ cytotoxic cells might be negatively regulated by serum IL-4.                  | 99  |
| 99 CRC patients and 107 healthy controls                     | ELISA                                                                | IL-4 serum levels were significantly higher in patients.                                                                                                 | 100 |
| 20 CRC patients                                              | fluorescent bead-based detection assay, Multiplex kit                | No IL-4 expression was detected in serum, normal mucosa or tumor tissue.                                                                                 | 101 |
| Primary CC cells isolated from 18 patients; nude mice        | RT-PCR, WB, FCM, transwell assay, FCM, TUNEL staining                | IL-4 could increase the expression of survivin by activating STAT6.                                                                                      | 102 |
| Primary human CC cells and T84 cells                         | FCM, IHC, Real-time PCR analysis                                     | Tumor-cell-derived IL-4 enhanced apoptosis resistance in primary human CC cells and T84 cells.                                                           | 103 |
| Primary and metastatic tumors from four CRC patients         | MagSweeper, whole-transcriptome analysis with RNA-Seq                | The expression of IL-4 was significantly up-regulated in CD133(+) cells compared to CD133(-) CRC cells                                                   | 104 |
| Primary CRC cells, NOD/SCID CB-17 mice                       | Immunofluorescence analysis, ELISA, subcutaneous tumor model of mice | Cancer-initiating cells associated IL-4 was responsible for weak immunogenicity <i>in vitro</i> .                                                        | 105 |
| 49 primary CC and 20 metastases                              | IHC                                                                  | Expression of IL-4 by > or = 20% of CC tumor infiltrating lymphocytes was associated with better prognosis.                                              | 106 |
| 41 metastatic CRC patients                                   | Bio-Plex human cytokine multiplex kits (Bio-Rad Inc.), FACS, IHC     | The patients with higher serum IL-4 levels have longer overall survival when receiving the thymidylate synthase poly-epitope-peptide anticancer vaccine. | 107 |
| 80 CRC patients and 38 matched controls                      | Human Th1/Th2 Cytokine Kit II (BD Biosciences)                       | IL-4 was measured from the supernatants of activated peripheral blood mononuclear cells. No significant difference was found.                            | 108 |
| Patients with CRC                                            | ELISA, EFA ingestion                                                 | Long-term EFA ingestion could reduce total serum IL-4 by 69% after 6 months.                                                                             | 109 |

Cell lines mentioned in this table are all human CC cell lines unless otherwise indicated. CRC: colon and rectal cancer; CC: colon cancer; FCM: flow cytometry; ELISA: enzyme-linked immunosorbent assay; WB: Western blot; IHC: immunohistochemistry; FAM120A: family with sequence similarity 120A; RT-PCR:

reverse transcription-polymerase chain reaction; MTT: 3-(4,5-Dimethylthiazol-2-yl)- 2,5-diphenyltetrazoliumbromid; 11 $\beta$ HSD2: 11 $\beta$ -hydroxysteroid dehydrogenase type II; IP: immunoprecipitation; qRT-PCR: quantitative real-time PCR; NOD/SCID: nonobese diabetic/severe combined immunodeficiency; CSC: cancer stem cell; FACS: fluorescence-activated cell sorting; Th: T helper; EFA: essential fatty acids.

**Supplemental Table 4.** Polymorphisms of IL-4/IL-13 and their receptors in GC

| First author<br>(year)          | Country                     | Ethnicity                    | Number of<br>cases/controls | SNPs                                                                                       | Result                                                                                                                                               |
|---------------------------------|-----------------------------|------------------------------|-----------------------------|--------------------------------------------------------------------------------------------|------------------------------------------------------------------------------------------------------------------------------------------------------|
| El-Omar (2003)<br>(116)         | USA                         | Mixed                        | 112/209                     | IL-4 (-590 C/T), rs2243250                                                                 | No significant association                                                                                                                           |
| Wu (2003) (117)                 | China                       | Asian                        | 220/230                     | IL-4, rs2243250; IL-4R, rs1805010; IL-4R, rs1801275                                        | Higher risk of developing diffuse type or cardia type cancer was observed for the CT/CC genotype of IL-4 at the position -590 (rs2243250).           |
| Lai (2005) (118)                | China                       | Asian                        | 123/162                     | IL-4 (-590), rs2243250                                                                     | No significant association                                                                                                                           |
| Garcia-Gonzalez<br>(2007) (119) | Spain                       | Caucasian                    | 404/404                     | IL-4 (-590 C>T), rs2243250                                                                 | No significant association                                                                                                                           |
| Crusius (2008)<br>(120)         | 10<br>European<br>countries | Caucasian                    | 235-244/1107-<br>1160       | IL-4, rs2243250; IL-4, rs2070874;<br>IL-4R, rs1805010; IL-4R, rs2057768                    | Rs2057768 is related with non-cardia gastric adenocarcinoma.                                                                                         |
| Zambon (2008)<br>(121)          | Italy                       | Caucasian                    | 144/171                     | IL-4 -588C>T, rs2243250;<br>IL-4RA Ex5+14A>G, rs1805010;<br>IL-4RA Ex11+828A>G, rs 1801275 | No significant association                                                                                                                           |
| Ando (2009)<br>(122)            | Japan                       | Asian                        | 330/190                     | IL-4 -590C/T;<br>IL-4Rα Ile50Val                                                           | No significant association                                                                                                                           |
| Ko (2009) (123)                 | Korea                       | Asian                        | 78-81/320-324               | rs2070874;<br>rs2243250                                                                    | No significant association                                                                                                                           |
| Wu (2009) (124)                 | China                       | Han<br>Chinese<br>population | 1042/1099                   | rs2070874                                                                                  | Compared with the IL-4 -168TT genotype, heterozygous -168TC and combined -168TC/CC genotypes were associated with a significantly decreased GC risk. |
| Pan (2014) (125)                | China                       | Asian                        | 308/307                     | rs2243250                                                                                  | No significant association                                                                                                                           |

|                                |          |            |             |                                                                                                    |                                                                                                                                                                                            |
|--------------------------------|----------|------------|-------------|----------------------------------------------------------------------------------------------------|--------------------------------------------------------------------------------------------------------------------------------------------------------------------------------------------|
| Yin (2015) (126)               | China    | Asian      | 234/465     | IL-13, rs1800925                                                                                   | No significant association with gastric cardiac adenocarcinoma risk                                                                                                                        |
| Cárdenas (2018) (45)           | Colombia | Mixed      | 15-17/20-30 | IL-4 -590 (C/T), IL-4 Ile50Val, IL-4 Q576R                                                         | No significant association                                                                                                                                                                 |
| Martínez-Campos C (2019) (127) | Mexico   | Mixed      | 124/125     | IL-4-590C/T (rs2243250)                                                                            | No significant association                                                                                                                                                                 |
| He B (2019) (128)              | China    | Asian      | 479/483     | IL-4 rs2243248; IL-4 rs2070874; IL-4R rs2057768; IL-4R rs2107356; IL-4R rs1805015; IL-4R rs1801275 | No significant association                                                                                                                                                                 |
| Yun Y (2017) (129)             | China    | Asian      | 340/364     | IL-4 rs2243250 (590 C/T), rs2227284 (107 T/C), rs2070874 (168 T/C) and rs1801275 (576 Q/R)         | The IL-4 rs2243250 CC genotype and CT+CC genotype were associated with higher GC risk.                                                                                                     |
| Burada F (2012) (130)          | Romania  | Caucasian  | 105/242     | IL-4R -3223C→T, rs2057768                                                                          | IL-4R -3223C→T polymorphism may increase the risk of gastric adenocarcinoma, mainly for the noncardia type.                                                                                |
| Xia HZ (2012) (131)            | China    | Asian      | 308/425     | IL-4R, rs2107356(G>A)                                                                              | A significant reduction of the IL-4R AA genotype in GC risk was found when compared to GG genotype.                                                                                        |
| Bhayal AC (2015) (132)         | India    | Asian      | 182/326     | IL-4 intron 3 variable number of tandem repeat (VNTR)                                              | The study revealed an association of 2R allele and 2R carrier genotypes in the etiopathogenesis of GC.                                                                                     |
| Sampaio AM (2015) (133)        | Portugal | Portuguese | 100/50      | IL-4 (-1098T>G), rs2243248; IL-4 (-590C>T), rs2243250; IL-4 (-33C>T), rs2070874                    | IL-4-590TT and IL-4-1098GG were found associated with intestinal type GC and diffuse type GC, respectively. IL-4 TTT haplotype was linked with both intestinal and diffuse type GC groups. |
| Seno H (2007) (134)            | Japan    | Asian      | 100/93      | IL-4 (11 SNPs), IL-4R (22 SNPs)                                                                    | The IL-4 gene diplotypes are negatively associated with the risk of developing GC due to Helicobacter pylori infection.                                                                    |

|                                 |           |           |                 |                                                                                                 |                                                                                                                                                    |
|---------------------------------|-----------|-----------|-----------------|-------------------------------------------------------------------------------------------------|----------------------------------------------------------------------------------------------------------------------------------------------------|
| Wang Y (2017) (135)             | China     | Asian     | 362/384         | IL-4, rs2243248 (-1098 G/T), rs2227284 (-33 C/T), rs2243250 (-589 T/C) and rs2070874 (-107 T/C) | The TC and CC genotypes of rs2243250 were associated with an increased risk of GC. The TTTT haplotype revealed a reduced risk of GC.               |
| Pavithra D (2018) (136)         | India     | Asian     | 200/400         | IL-4C-590-T                                                                                     | No significant association                                                                                                                         |
| Cavalcante (2017) (137)         | Brazil    | Mixed     | 119/474         | IL-4, rs79071878, VNTR                                                                          | rs79071878 was positively associated with the development of GC.                                                                                   |
| Sarah Yang (2017) (138)         | Korea     | Asian     | 368-377/736-754 | IL-4R (rs7205663 and rs1805010); IL-13 (rs6596090, rs20541)                                     | No significant association                                                                                                                         |
| Wang YM (2016) (139)            | China     | Asian     | 132/1198        | IL-4R rs2057768                                                                                 | No significant association                                                                                                                         |
| Schmidt HM (2011) (140)         | Singapore | Asian     | 60/162          | IL-13, rs1800925; IL-4, rs2070874; IL-4R, rs1801275.                                            | No significant association                                                                                                                         |
| García-González MA (2012) (141) | Spain     | Caucasian | 380/-           | IL-4, rs2243250                                                                                 | Not relevant in determining the prognosis of gastric adenocarcinoma                                                                                |
| Talebkhani Y (2017) (142)       | Iran      | Caucasian | 31/46           | IL-4 C-590T                                                                                     | Serum antibodies against Helicobacter pylori neutrophil activating protein in carriers of IL-4 C-590T genetic polymorphism amplify the risk of GC. |

---

GC: gastric cancer; SNPs: single nucleotide polymorphisms.

**Supplemental Table 5.** Polymorphisms of IL-4/IL-13 and their receptors in colorectal cancer (CRC)

| First author (year)        | Country | Ethnicity | Number of cases/controls | SNPs                                                                 | Result                                                                                                                                                                       |
|----------------------------|---------|-----------|--------------------------|----------------------------------------------------------------------|------------------------------------------------------------------------------------------------------------------------------------------------------------------------------|
| Walczak A (2011) (143)     | Poland  | Caucasian | 150/170                  | IL-13, rs1800925                                                     | The CT genotype is connected with a higher risk of colon cancer occurrence.                                                                                                  |
| Ibrahimi M (2019) (144)    | Iran    | Iranian   | 123/152                  | IL-4 VNTR, RP1/RP1, RP1/RP2                                          | No significant association                                                                                                                                                   |
| Landi S (2007) (145)       | Spain   | Caucasian | 377/326                  | IL-4 (-588C>T, Ex1-168G>A); IL-4R (I75V, C431R, S436L, S503P, Q576R) | The homozygotes for IL-4 -588C>T or for Ex1-168G>A showed an increased risk for colon cancer. Women showed an increased risk associated to the IL-4 rare alleles.            |
| Lee YS (2009) (146)        | Korea   | Asian     | 170/130                  | IL-4R 1902                                                           | The IL-4R 1902*T allele was found to be associated with an increased risk of colon cancer and rectal cancer, while IL-4R 1902*C allele was associated with a decreased risk. |
| Cavalcante GC (2017) (137) | Brazil  | Mixed     | 63/474                   | IL-4, rs79071878, VNTR                                               | No significant association                                                                                                                                                   |
| Jose M Cozar (2007) (147)  | Spain   | Caucasian | 96/176                   | IL-4-590 C>T (rs2243250)                                             | No significant association                                                                                                                                                   |
| Suchy (2008) (148)         | Poland  | Caucasian | 607/350                  | IL-4 (-590 C/T)                                                      | No significant association                                                                                                                                                   |
| Wilkening (2008) (149)     | Sweden  | Caucasian | 308/585                  | IL-4-590C/T (rs2243250); IL-4R-3223G/A (rs2057768)                   | The rare T allele of IL-4-590 was related to a longer survival. The prognostic value of the genotypes was of borderline significance.                                        |

|                              |                |           |          |                                                                                    |                                                                                                                                                                                                                           |
|------------------------------|----------------|-----------|----------|------------------------------------------------------------------------------------|---------------------------------------------------------------------------------------------------------------------------------------------------------------------------------------------------------------------------|
| Levar Shamoun (2018) (150)   | Sweden         | Caucasian | 466/445  | IL-4, rs2243250; IL-4R $\alpha$ , rs1801275; IL-13, rs1800925                      | IL-13 SNP rs1800925 is a risk factor for CRC and that IL-4 SNP rs2243250 could be a useful prognostic marker.                                                                                                             |
| Yanming Yu (2017) (151)      | China          | Asian     | 513/572  | IL-13: rs847 A>G; IL-13: rs848 T>G; IL-13: rs1295685 C>T                           | A significant antagonistic interaction was found between rs848 (G-T) and allium vegetable intake; moreover, significant combined and synergistic interactions were observed for all three SNPs and overnight meal intake. |
| Y Yu (2014) (152)            | China          | Asian     | 299/296  | IL-4 rs2070874                                                                     | No significant association                                                                                                                                                                                                |
| Diego Marques (2017) (153)   | Brazil         | Mixed     | 140/140  | IL-4 rs79071878                                                                    | Polymorphism variations in IL-4 gene was associated with increased CRC risk.                                                                                                                                              |
| Walczak A (2012) (154)       | Poland         | Caucasian | 191/205  | IL-13 - 1112 C/T, rs1800925                                                        | The CT and TT genotypes of the IL-13 - 1112 C/T polymorphism may be connected with a higher risk of CRC.                                                                                                                  |
| Raul Zamora-Ros (2015) (155) | Spain          | Caucasian | 274/266  | IL-4, rs2243250                                                                    | The novel dietary inflammatory index (DII) score was inversely correlated with SNP rs2243250, and an interaction was observed with CRC risk.                                                                              |
| Xiulin Wen (2020) (156)      | China          | Asian     | 248/463  | IL-4, rs2243250 and rs2227284                                                      | rs2243250 and rs2227284 in IL-4 are associated significantly with reduced CRC risk.                                                                                                                                       |
| Nicola Ingram (2013) (62)    | United Kingdom | Caucasian | 1502/584 | IL-4R $\alpha$ : rs1801275, rs1805015, rs1805016, rs1805013, rs1805011, rs1805010. | SNP rs1801275 was associated with increased CRC risk. Reduced IL-4R signalling was associated with increased CRC initiation and risk but reduced tumour progression and no effect on CRC mortality.                       |
| Florin Burada (2013) (157)   | Romania        | Caucasian | 144/233  | IL-4R -3223C > T                                                                   | No significant association                                                                                                                                                                                                |
| Yannopoulos (2007) (158)     | Greece         | Caucasian | 93/108   | IL-4 (-590 C/T)                                                                    | The (-590 C/T) polymorphism in the IL-4 gene is associated with increased risk for early stages of colorectal adenocarcinoma.                                                                                             |

|                                 |         |           |           |                                            |                                                                                                                                  |
|---------------------------------|---------|-----------|-----------|--------------------------------------------|----------------------------------------------------------------------------------------------------------------------------------|
| Bente A Talseth<br>(2007) (159) | Poland  | Caucasian | 118/100   | IL-4 C-589T (rs2243250)                    | No significant association between SNP rs2243250 and hereditary non-polyposis CRC.                                               |
| Juan Sainz<br>(2012) (160)      | Germany | Caucasian | 1798/1810 | IL-13, rs20541                             | Patients harboring the IL-13_rs20541_T allele had a reduced risk of CRC.                                                         |
| Lin Xiao (2016)<br>(161)        | China   | Asian     | 58/-      | IL-13, 1112 C/T (rs1800925)                | The studied SNP does not predict responsiveness to neoadjuvant chemoradiotherapy or prognosis of locally advanced rectal cancer. |
| A Ho-Pun-Cheung (2011)<br>(162) | France  | Caucasian | 71/-      | IL-4, rs2243250; IL-13, rs20541, rs1800925 | The SNP IL-13 rs1800925 was significantly associated with rectal adenocarcinoma response to chemoradiation.                      |

---

CRC: colon and rectal cancer; SNPs: single nucleotide polymorphisms.
